# Supplementary material for: Identification and validation of appropriate reference genes for gene expression analysis in Schima superba
Source: Research Square preprint supplement (doi:10.21203/rs.3.rs-361995/v1), 2021-04-07
Supplement: Supplementary file 1 [file 37fe716f9f8db7f76e157e22.xlsx]

## Sheet: Sheet1
Table S4 Quality of total RNA from different tissues in S. superba
Sample	Concentration (ng/μl）	OD260/280	OD260/230
Root	53.03	2.12	0.2
Phloem	327.53	2.14	1.16
Xylem	189.8	2.12	1.16
Leaf	162.17	2.1	1.38
Bud	697.53	2.17	1.7
Fruit	489.43	2.04	1.33
