# Supplementary material for: Identification and validation of appropriate reference genes for gene expression analysis in Schima superba
Source: Research Square preprint supplement (doi:10.21203/rs.3.rs-361995/v1), 2021-04-07
Supplement: Supplementary file 2 [file edc43e4cce8cbd1ccb5d1f08.xlsx]

## Sheet: Sheet1
Table S3 Primers used for qRT-PCR of reference genes and target gene
Gene	Forward primer sequence	Reverse primer sequence	Amplification length (bp)	Tm (℃)
ColGAPDH*	GGGAATCCTTGGTTACACTGAG	ACCCCATTCGTTGTCATACC	145	55
SsuACT	CTTGCTGGCCGTGATCTAAC	CTTTTCGACTGAGGAGCTGC	178	56
SsuCal7	ACAAGGACGGAGATGGTTGT	GTCGAAAACCCGGAAAGCTT	221	56
SsuCas	ATCTGGCCATGCTGATGAAG	ACTGCAATAGAGGCCTGGAC	161	57
SsueIF5	TCCCTTCCTCCCACAATTGT	GGGTGAGCAGAGAGTCATCA	153	56
SsuGAPDH	TGGGGTTACAGTGATTTTGTGA	TTCCTCCCATCTACGCACTC	243	58
SsuGTP	ATTCTCGCATCACTCGGTCT	CCCGATACTAAGCTCCTCCG	159	56
SsuHis	CCATTCCAGAGGCTTGTTCG	GCATGATAGTGACCCGCTTG	166	56
SsuMDH	AAGGGAGTTGCTGCTGATCT	GCATCAGGGCAGTTATCAGC	221	56
SsuMet2	ATGTCTTGCTGCGGAGGAAA	CACACCCATCTCAGTTCCCT	174	56
SsuRIB	GTTCAAGAGGACCCAAAGCG	CCAGCTCTTTGACATTGTGGA	200	56
SsuTUA1	ATGATGGCCAAATGTGACCC	GCTGTGTTGTTGCTTATCATGC	249	57
SsuTUA2	CTGATGGACAAATGCCGAGC	ATGAGTTGCTCTGGGTGGAA	184	56
SsuTUB	CCCAAGGGTCTGAAAATGGC	CTCAGCCTCGGTAAACTCCA	165	57
SsuUBC1	CTGCTGGGGAAGGGATTACA	CGATCATCAGCCGGTTTCTG	187	56
SsuUBC17	CAGGTTGCGTTCAGGACAAA	CTCCTGGCGGTTGTCTCATA	224	56
SsuUBC2	TGCAAGGAAGAGGCTGATGA	ATTCGGGAAACAAAGCGCAC	216	56
SsuUBCJ2	TGTTCCAGAGCAGGTGTCAA	AGTAACAGCAGCATCCAGGT	171	56
SsuUDP	CGTTTACCCCTGCAACAACA	ACCAAACAAGGCAGCACAAA	164	57
SsuSND1	TGCCCTTTCAATTCAGCTCT	GAGAAATCCGTGGCTGTTGT	153	60
